# Supplementary material for: Bone health in transgender assigned female at birth people: effects of gender-affirming hormone therapy and gonadectomy
Source: PubMed Central journal article supplement (PMC11464845; doi:10.3389/fendo.2024.1416121), 2024-09-26

## Supplementary Materials

**Figure 1:** linear correlation between LS-BMD and BMI (A), LS-Z score and BMI (B), TH-BMD and BMI (C), TH-Z score and BMI (D), FN-BMD and BMI (E), FN-Z score and BMI (F).

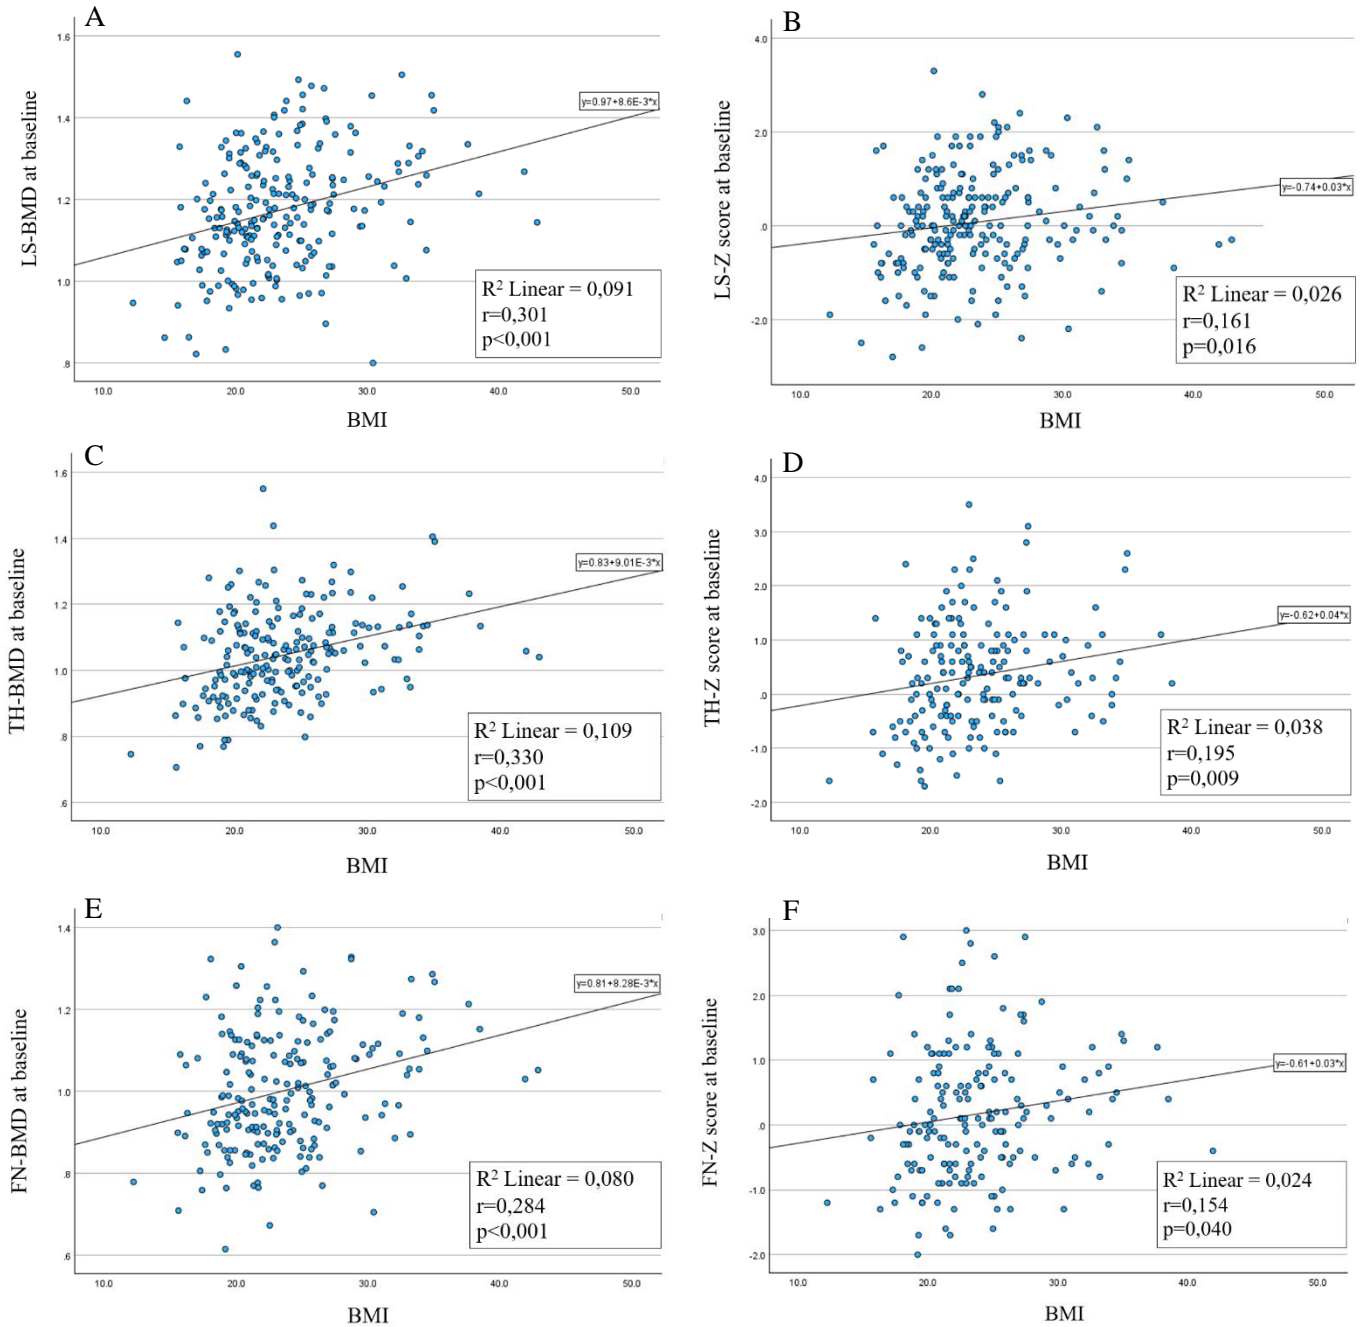

Supplement: DataSheet1.pdf [file DataSheet1.pdf]
